# Supplementary material for: Disjunction and Vicariance Between East and West Asia: A Case Study on Euonymus sect. Uniloculares Based on Plastid Genome Analysis
Source: Front Plant Sci. 2022 Mar 11;13:825209. doi: 10.3389/fpls.2022.825209 (PMC8963480; doi:10.3389/fpls.2022.825209)
Supplement: Supplementary file 2 [file Table_2.XLSX]

## Sheet: Sheet1
S-2 E. sect. Uniloculares Coding genes Nucleotide Diversity
Genes	Pi-Value	Standard Deviation of Pi	Number of Polymorphic (Segregating) Sites	Total number of Mutations, Eta	Window length	Step Size
trnH-GUG	0	0	0	0	36	9
psbA	0.0005	0.00016	1	1	100	25
trnK-UUU tRNA	0	0	0	0	39	10
matK	0.0023	0.00053	10	10	100	25
rps16	0.00222	0.00092	2	2	100	25
trnQ-UUG tRNA	0	0	0	0	37	10
psbK	0.00179	0.00116	1	1	100	25
psbI	0	0	0	0	100	25
trnS-GCU	0	0	0	0	44	11
trnG-GCC	0	0	0	0	46	12
trnR-UCU	0.00087	0.00029	4	4	100	25
atpA	0.0012	0.00078	2	2	100	25
atpF	0.00136	0.00087	1	1	100	25
atpH	0.00136	0.00087	1	1	100	25
atpI	0.00045	0.00029	1	1	100	25
rps2	0.00075	0.00024	1	1	100	25
rpoC2	0.00249	0.00056	28	29	100	25
rpoC1	0	0	0	0	100	25
rpoB	0.0012	0.00026	11	11	100	25
trnC-GCA	0.00751	0.00242	1	1	41	11
petN	0	0	0	0	46	12
psbM	0.0444	0.02664	16	16	100	25
trnD-GUC	0	0	0	0	38	10
trnY-GUA tRNA	0	0	0	0	43	11
trnE-UUC	0	0	0	0	38	10
trnT-GGU tRNA	0	0	0	0	37	10
psbD	0.0005	0.00016	1	1	100	25
psbC	0.00047	0.00019	2	2	100	25
trnS-UGA tRNA	0	0	0	0	47	12
psbZ	0.00529	0.00236	3	3	100	25
trnG-GCC tRNA	0	0	0	0	36	9
trnfM-CAU	0	0	0	0	38	10
rps14	0	0	0	0	100	25
psaB	0.00124	0.00018	7	7	100	25
psaA	0.00133	0.00056	9	9	100	25
ycf3	0.00171	0.00049	2	2	100	25
trnS-GGA tRNA	0	0	0	0	44	11
rps4	0	0	0	0	100	25
trnT-UGU tRNA	0	0	0	0	38	10
trnL-UAA tRNA	0	0	0	0	44	11
trnF-GAA tRNA	0.00457	0.00295	1	1	37	10
ndhJ	0	0	0	0	100	25
ndhK	0.00175	0.00063	3	3	100	25
ndhC	0.00239	0.00068	2	2	100	25
trnV-UAC tRNA	0	0	0	0	38	10
trnM-CAU tRNA	0	0	0	0	37	10
atpE	0.00547	0.00262	6	6	100	25
atpB	0.00138	0.00032	5	5	100	25
rbcL	0.00154	0.00066	6	6	100	25
accD	0.00341	0.00079	14	15	100	25
psaI	0	0	0	0	100	25
ycf4	0.00156	0.00045	2	2	100	25
cemA	0.00097	0.0004	2	2	100	25
petA	0.00263	0.00057	7	7	100	25
psbJ	0	0	0	0	100	25
psbL	0	0	0	0	100	25
psbF	0	0	0	0	100	25
psbE	0	0	0	0	100	25
petL gene	0.00347	0.00224	1	1	49	13
petG	0	0	0	0	100	25
trnW-CCA tRNA	0.0087	0.00187	1	1	38	10
trnP-UGG tRNA	0	0	0	0	38	10
psaJ gene	0.00395	0.00128	1	1	100	25
rpl33 gene	0	0	0	0	100	25
rps18 gene	0.00204	0.00085	2	2	100	25
rpl20 gene	0.00245	0.0007	2	2	100	25
clpP gene	0	0	0	0	100	25
psbB gene	0.00065	0.0002	3	3	100	25
psbT gene	0	0	0	0	100	25
psbN gene	0	0	0	0	100	25
psbH gene	0.0015	0.00097	1	1	100	25
petB gene	0.00051	0.00033	1	1	100	25
petD gene	0	0	0	0	100	25
rpoA gene	0.00347	0.00076	10	10	100	25
rps11 gene	0.0008	0.00052	1	1	100	25
rpl36 gene	0.00292	0.00189	1	1	100	25
infA gene	0	0	0	0	100	25
rps8 gene	0.00084	0.00054	1	1	100	25
rpl14 gene	0.00524	0.00153	4	5	100	25
rpl16 gene	0.00245	0.00109	3	3	100	25
rps3 gene	0.00284	0.0008	5	5	100	25
rpl22 gene	0.00392	0.00163	4	4	100	25
rps19 gene	0	0	0	0	100	25
rpl2 gene	0.00039	0.00025	1	1	100	25
rpl23 gene	0	0	0	0	100	25
trnI-CAU Trna	0.23961	0.07733	31	31	40	10
ycf2	0.00022	6e-05	4	4	100	25
trnL-CAA tRNA	0	0	0	0	41	11
ndhB	0	0	0	0	100	25
rps7	0	0	0	0	100	25
rps12	0.00179	0.00074	2	2	100	25
ycf15	0	0	0	0	50	13
trnV-GAC tRNA	0	0	0	0	37	10
rrn16 rRNA	0	0	0	0	100	25
trnI-GAU tRNA	0	0	0	0	39	10
trnA-UGC gene	0	0	0	0	37	10
rrn23 rRNA	0.0005	0.00013	3	3	100	25
rrn4.5 rRNA	0	0	0	0	100	25
rrn5 rRNA	0	0	0	0	100	25
trnR-ACG tRNA	0	0	0	0	38	10
trnN-GUU tRNA	0	0	0	0	37	10
ndhF	0.00215	0.00075	9	9	100	25
rpl32 gene	0.00481	0.00189	2	2	100	25
trnL-UAG tRNA	0	0	0	0	41	11
ccsA gene	0.00514	0.0014	12	12	100	25
ndhD	0.002	0.00074	9	9	100	25
psaC gene	0.00407	0.00182	3	3	100	25
ndhE gene	0	0	0	0	100	25
ndhG gene	0.00163	0.00047	2	2	100	25
ndhI gene	0.00189	0.00057	3	3	100	25
ndhA	0.00183	0.00035	6	6	100	25
ndhH gene	0.00367	0.00069	10	10	100	25
rps15	0	0	0	0	100	25
ycf1	0.00618	0.00098	93	93	100	25
